# Supplementary material
Source: PubMed Central journal article supplement (PMC7737657)
Supplement: NIHMS1652987-supplement-1.pdf [file NIHMS1652987-supplement-1.pdf]

## **eAppendix 1. Construction of the study sample, index dates, and treatment completion**

### **Algorithm used to identify patients with hepatitis C virus**

The details of the algorithm and diagnoses codes used to identify the study sample were described in eAppendix 1 of a previous publication cited below.<sup>1</sup>

### **Index date construction and robustness checks**

We constructed an index date for each patient following a commonly used approach – we identified the first HCV claim after at least a one-year “wash-out” period with no HCV claim. Patients with an index date in 2014 had a one-year wash-out period, while the 2015 and 2016 cohorts had 2-year and 3-year wash-out periods, respectively. About 55% of the total sample had at least a two-year wash-out period. An analysis using only these patients with a longer wash-out period produced results consistent with the main study findings: the hazard ratio (HR) of dying between DAA users and non-users was 0.51 (95% CI, 0.44-0.59) in the cirrhosis group, and 0.65 (95% CI, 0.59-0.73) in the non-cirrhosis group.

We checked the index date based on our approach against the date of viral hepatitis diagnosis included in the Beneficiary File. This diagnosis date is not hepatitis C specific but is based on any hepatitis (hepatitis A, B, C, D and E), so it is subject to some measurement error. About 46% of the study sample – *in both DAA users and non-users* – had an index date that matched the hepatitis diagnosis date. Analyses with only these beneficiaries showed consistent results with the main study finding: the HR of dying between DAA users and non-users was 0.46 (95% CI, 0.38-0.55) in the cirrhosis group and 0.54 (95% CI, 0.48-0.60) in the non-cirrhosis group.

### **Definition of completion of treatment**

Details of how we defined completion of direct-acting antivirals (DAAs) introduced before 2017, including elbasvir/grazoprevir, ledipasvir/sofosbuvir, ombitasvir/paritaprevir/ritonavir plus dasabuvir, sofosbuvir, and sofosbuvir/velpatasvir were described in eAppendix 2 of a previous publication cited below.<sup>1</sup> We also included the following DAAs that were approved in 2017 in this study: sofosbuvir/velpatasvir/voxilaprevir and glecaprevir/pibrentasvir.

DAA regimens vary by genotype and prior HCV treatment experience, which cannot be identified from Medicare claims. Based on the recommended duration of therapy indicated by package inserts, we considered 12 weeks of treatment with ofosbuvir/velpatasvir/voxilaprevir or glecaprevir/pibrentasvir as completion. If patients filled prescriptions for more than 12 weeks, we considered 16 weeks as completion for glecaprevir/pibrentasvir, and 24 weeks for sofosbuvir/velpatasvir/voxilaprevir. We considered an interval between fills of fewer than 60 days as continuation of the therapy.

### **References**

1. Jung J, Feldman R, Kalidindi Y, et al (Accepted for publication). Association of direct acting antiviral therapy for hepatitis C with after treatment costs among Medicare beneficiaries. *JAMA Network Open*

## eTable 1. Definitions and data sources of the covariates used in the study

The data sources and covariates used in this study have been defined in eTable 1 of a previous publication cited below.<sup>1</sup> In addition to the covariates used in the prior study, we included a variable for dual-eligibility status in this study. The definition and data source for dual-eligibility status are provided below:

|               | <b>Definition</b>                                                                             | <b>Data Source</b>                       |
|---------------|-----------------------------------------------------------------------------------------------|------------------------------------------|
| Dual-eligible | Binary indicator that indicates whether a patient was eligible for both Medicare and Medicaid | Medicare master beneficiary summary file |

### References

1. Jung J, Feldman R, Kalidindi Y, et al (Accepted for publication). Association of direct acting antiviral therapy for hepatitis C with after treatment costs among Medicare beneficiaries. *JAMA Network Open*

**eTable 2. Patient characteristics in the full unmatched sample<sup>a</sup>**

| Variable                                                  | Cirrhosis patients (N=14,491) |                          |                         | Non-cirrhosis patients (N=95,118) |                          |                         |
|-----------------------------------------------------------|-------------------------------|--------------------------|-------------------------|-----------------------------------|--------------------------|-------------------------|
|                                                           | DAA Treated (N=4,122)         | DAA Untreated (N=10,369) | St.Diff, <sup>b</sup> % | DAA Treated (N=21,619)            | DAA Untreated (N=73,499) | St.Diff, <sup>b</sup> % |
|                                                           | No. (%)                       | No. (%)                  |                         | No. (%)                           | No. (%)                  |                         |
| <b>Age</b>                                                |                               |                          |                         |                                   |                          |                         |
| Age <65                                                   | 2,357(57.1%)                  | 5,454(52.6%)             | 9.2                     | 14,344(66.4%)                     | 4,5962(62.5%)            | 8.0                     |
| Age 65-70                                                 | 9,31(22.6%)                   | 1,966(19.0%)             | 8.9                     | 4,144(19.2%)                      | 1,1571(15.7%)            | 9.0                     |
| Age 70-75                                                 | 4,58(11.1%)                   | 1,351(13.0%)             | -5.9                    | 1,941(9.0%)                       | 7,118(9.7%)              | -2.4                    |
| Age >75                                                   | 3,76(9.1%)                    | 1,598(15.4%)             | -19.3                   | 1,190(5.5%)                       | 8,848(12.0%)             | -23.3                   |
| <b>Female Gender</b>                                      | 1,515(36.7%)                  | 4,065(39.2%)             | -5.0                    | 8,994(41.6%)                      | 31,684(43.1%)            | -3.0                    |
| <b>Race</b>                                               |                               |                          |                         |                                   |                          |                         |
| White                                                     | 2,917(70.8%)                  | 7,371(71.1%)             | -0.7                    | 14,358(66.4%)                     | 51,078(69.5%)            | -6.6                    |
| African American                                          | 872(21.2%)                    | 1,733(16.7%)             | 11.4                    | 5,823(26.9%)                      | 16,250(22.1%)            | 11.2                    |
| Hispanic                                                  | 145(3.5%)                     | 587(5.7%)                | -10.3                   | 595(2.8%)                         | 2,404(3.3%)              | -3.0                    |
| Other                                                     | 188(4.6%)                     | 678(6.5%)                | -8.6                    | 843(3.9%)                         | 3,767(5.1%)              | -5.9                    |
| <b>Dual eligibility<sup>c</sup></b>                       | 2,733(66.3%)                  | 7,190(69.3%)             | -6.5                    | 15,182(70.2%)                     | 53,706(73.1%)            | -6.3                    |
| <b>Conditions</b>                                         |                               |                          |                         |                                   |                          |                         |
| Decompensated cirrhosis                                   | 1,248(30.3%)                  | 4,620(44.6%)             | -29.8                   | -                                 | -                        | .                       |
| HIV/AIDS                                                  | 109(2.6%)                     | 356(3.4%)                | -4.6                    | 1,175(5.5%)                       | 3,751(5%)                | 1.5                     |
| Hepatocellular cancer                                     | 239(5.8%)                     | 947(9.1%)                | -12.7                   | 76(0.4%)                          | 442(0.6%)                | -3.6                    |
| Anemia                                                    | 1,808(43.9%)                  | 6,999(67.5%)             | -49.0                   | 5,572(25.8%)                      | 30,989(42.2%)            | -35.1                   |
| Lung Disease                                              | 1,166(28.3%)                  | 4,413(42.6%)             | -30.2                   | 5,364(24.8%)                      | 28,347(38.6%)            | -29.9                   |
| Cancer                                                    | 524(12.7%)                    | 1,833(17.7%)             | -13.9                   | 2,208(10.2%)                      | 10,775(14.7%)            | -13.5                   |
| Cardiac disease                                           | 3,140(76.2%)                  | 9,066(87.4%)             | -29.5                   | 14,742(68.2%)                     | 57,938(78.8%)            | -24.3                   |
| Dementia                                                  | 254(6.2%)                     | 1,796(17.3%)             | -35.2                   | 895(4.1%)                         | 9,000(12.2%)             | -29.9                   |
| Psychiatric conditions                                    | 1,810(43.9%)                  | 5,869(56.6%)             | -25.6                   | 10,840(50.1%)                     | 44,447(60.5%)            | -20.9                   |
| Diabetes                                                  | 1,554(37.7%)                  | 5,279(50.9%)             | -26.8                   | 6,123(28.3%)                      | 26,657(36.3%)            | -17.1                   |
| Eye disease                                               | 675(16.4%)                    | 1,729(16.7%)             | -0.8                    | 3,403(15.7%)                      | 10,962(14.9%)            | 2.3                     |
| Kidney disorders                                          | 1,150(27.9%)                  | 5,351(51.6%)             | -49.9                   | 4,160(19.2%)                      | 25,728(35.0%)            | -36.0                   |
| Drug and alcohol related disorder                         | 2,052(49.8%)                  | 6,531(63.0%)             | -26.9                   | 10,123(46.8%)                     | 42,688(58.1%)            | -22.7                   |
| Bone disease                                              | 1,520(36.9%)                  | 4,567(44.0%)             | -14.6                   | 8,419(38.9%)                      | 32,017(43.6%)            | -9.4                    |
| ESRD                                                      | 164(4.0%)                     | 969(9.3%)                | -21.6                   | 703(3.2%)                         | 6,244(8.5%)              | -22.4                   |
| <b>Time from index date<sup>d</sup> to DAA initiation</b> |                               |                          |                         |                                   |                          |                         |
| <6 months                                                 | 1,151(27.9%)                  | NA                       |                         | 7161(33.1%)                       | NA                       |                         |
| 6-12 months                                               | 1,506(36.6%)                  |                          |                         | 6907(31.9%)                       |                          |                         |
| 12-24 months                                              | 1,086(26.4%)                  |                          |                         | 5195(24.0%)                       |                          |                         |
| 24-36 months                                              | 302(7.3%)                     |                          |                         | 1866(8.6%)                        |                          |                         |
| >36 months                                                | 77(1.9%)                      |                          |                         | 490(2.3%)                         |                          |                         |

Abbreviations: AIDS, Acquired immunodeficiency syndrome; DAA, Direct-acting antiviral drug; ESRD, End-stage renal disease; HIV, Human immunodeficiency virus; St.Diff, Standardized difference

<sup>a</sup> Patient characteristics are measured at index date

<sup>b</sup> A standardized difference less than 10% is considered to denote balanced patient characteristics

<sup>c</sup> Dual eligibility is an indicator of whether a person is eligible for both Medicare and Medicaid

<sup>d</sup> Index date is the date when the patient first sought HCV care after a one-year wash-out period

**eTable 3. Full results – adjusted hazard ratios<sup>a</sup> for mortality comparing direct-acting antiviral agent (DAA) treated and DAA untreated patients**

| Variable                                           | Cirrhosis patients<br>(N=8,240) |       | Non-cirrhosis patients<br>(N=43,238) |       |
|----------------------------------------------------|---------------------------------|-------|--------------------------------------|-------|
|                                                    | HR (95% CI)                     | P     | HR (95% CI)                          | P     |
| <b>DAA treatment as time-varying exposure</b>      | 0.51 (0.46-0.57)                | <.001 | 0.54 (0.50-0.58)                     | <.001 |
| <b>Age (ref. Age&lt;65)</b>                        |                                 |       |                                      |       |
| Age 65-70                                          | 1.24 (1.09-1.40)                | <.001 | 1.40 (1.28-1.53)                     | <.001 |
| Age 70-75                                          | 1.37 (1.16-1.61)                | <.001 | 1.40 (1.24-1.58)                     | <.001 |
| Age >75                                            | 1.59 (1.33-1.90)                | <.001 | 2.13 (1.86-2.43)                     | <.001 |
| <b>Gender (ref. Male)</b>                          |                                 |       |                                      |       |
| Female                                             | 0.85 (0.76-0.94)                | 0.002 | 0.68 (0.64-0.73)                     | <.001 |
| <b>Race (ref. White)</b>                           |                                 |       |                                      |       |
| African American                                   | 1.03 (0.91-1.17)                | 0.59  | 0.88 (0.81-0.95)                     | 0.00  |
| Hispanic                                           | 0.76 (0.58-1.01)                | 0.06  | 0.53 (0.40-0.70)                     | <.001 |
| Other                                              | 0.81 (0.63-1.03)                | 0.09  | 0.66 (0.54-0.81)                     | <.001 |
| Dual eligibility <sup>b</sup>                      | 1.06 (0.95-1.18)                | 0.31  | 1.16 (1.07-1.26)                     | 0.002 |
| <b>Cirrhosis type (ref. Compensated cirrhosis)</b> |                                 |       |                                      |       |
| Decompensated cirrhosis                            | 1.90 (1.72-2.09)                | <.001 | .                                    | .     |
| <b>Conditions</b>                                  |                                 |       |                                      |       |
| HIV/AIDS                                           | 0.73 (0.51-1.04)                | 0.08  | 1.06 (0.92-1.22)                     | 0.42  |
| Hepatocellular cancer                              | 2.31 (2.00-2.67)                | <.001 | 3.76 (2.76-5.12)                     | <.001 |
| Anemia                                             | 1.46 (1.32-1.62)                | <.001 | 1.53 (1.42-1.64)                     | <.001 |
| Lung Disease                                       | 1.22 (1.10-1.35)                | <.001 | 1.49 (1.38-1.59)                     | <.001 |
| Cancer                                             | 0.98 (0.85-1.12)                | 0.74  | 1.24 (1.13-1.36)                     | <.001 |
| Cardiac disease                                    | 1.06 (0.93-1.21)                | 0.37  | 1.21 (1.11-1.32)                     | <.001 |
| Dementia                                           | 1.28 (1.07-1.54)                | 0.01  | 1.69 (1.50-1.90)                     | <.001 |
| Psychiatric conditions                             | 0.93 (0.84-1.03)                | 0.15  | 1.06 (0.98-1.38)                     | 0.12  |
| Diabetes                                           | 0.96 (0.86-1.06)                | 0.38  | 1.15 (1.07-1.23)                     | <.001 |
| Eye disease                                        | 0.88 (0.77-1.01)                | 0.07  | 0.88 (0.80-0.96)                     | 0.001 |
| Kidney disorders                                   | 1.21 (1.08-1.35)                | <.001 | 1.71 (1.58-1.85)                     | <.001 |
| Drug and alcohol related disorder                  | 1.39 (1.24-1.55)                | <.001 | 1.32 (1.22-1.42)                     | <.001 |
| Bone disease                                       | 0.88 (0.80-0.98)                | 0.02  | 0.90 (0.84-0.96)                     | 0.007 |
| ESRD                                               | 1.14 (0.92-1.42)                | 0.24  | 1.55 (1.36-1.76)                     | <.001 |

Abbreviations: AIDS, Acquired immunodeficiency syndrome; CIs, Confidence intervals; DAA, Direct-acting antiviral drug; ESRD, End-stage renal disease; HR, Hazard ratios; HIV, Human immunodeficiency virus

<sup>a</sup> Adjusted for patient characteristics and risk factors summarized in eTable2

<sup>b</sup> Dual eligibility is an indicator of whether a person is eligible for both Medicare and Medicaid

**eTable 4. Interaction tests to assess significance of treatment effects across subgroup**

| Variable                                                               | Cirrhosis patients<br>(N=8,240) |        | Non-cirrhosis patients<br>(N=43,238) |        |
|------------------------------------------------------------------------|---------------------------------|--------|--------------------------------------|--------|
|                                                                        | Coefficient                     | P      | Coefficient                          | P      |
| <b>Subgroup: Gender</b>                                                |                                 |        |                                      |        |
| DAA treatment as time-varying exposure                                 | -0.63                           | <0.001 | -0.60                                | <0.001 |
| Female                                                                 | -0.13                           | 0.03   | -0.38                                | <0.001 |
| Interaction - DAA treatment as time-varying exposure and female        | -0.13                           | 0.27   | -0.03                                | 0.71   |
| <b>Subgroup: Dual-eligibility<sup>a</sup></b>                          |                                 |        |                                      |        |
| DAA treatment as time-varying exposure                                 | -0.69                           | <0.001 | -0.77                                | <0.001 |
| Dual-eligible                                                          | 0.05                            | 0.45   | 0.08                                 | 0.09   |
| Interaction - DAA treatment as time-varying exposure and dual-eligible | 0.03                            | 0.80   | 0.22                                 | 0.02   |

<sup>a</sup> Dual eligibility is an indicator of whether a person is eligible for both Medicare and Medicaid

**eFigure 1. Cirrhosis patients – Survival stratified by receipt of Direct-Acting Antiviral (DAA) therapy (by patient sub-group)**

**A. Female**

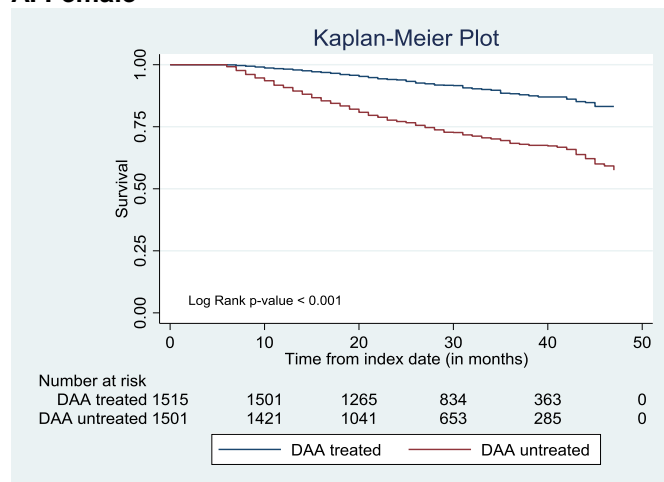

**B. Male**

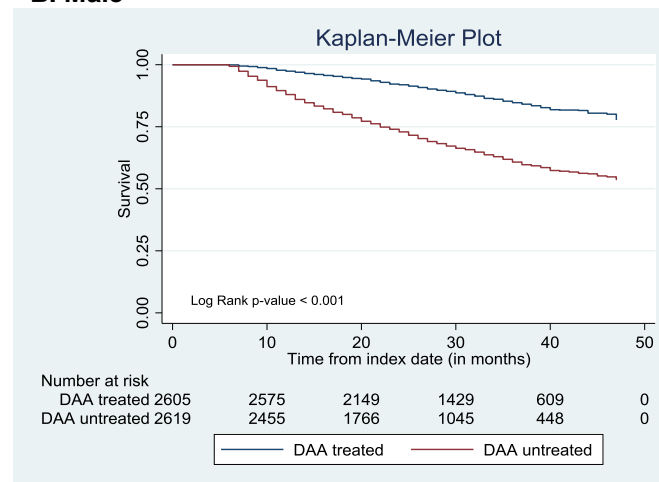

**C. Non-dual-eligible<sup>a</sup>**

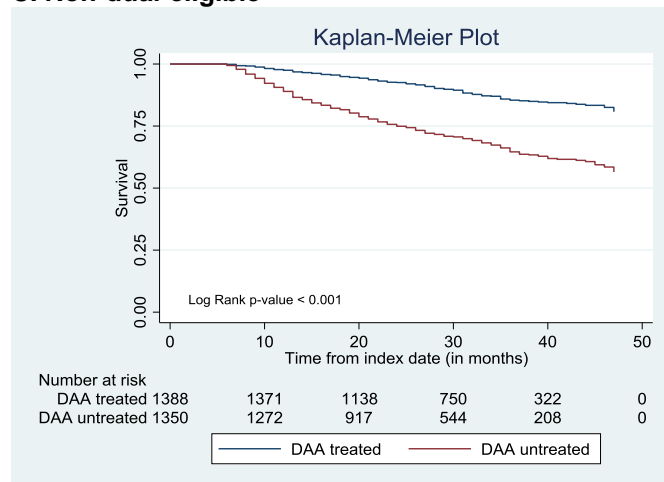

**D. Dual eligible<sup>b</sup>**

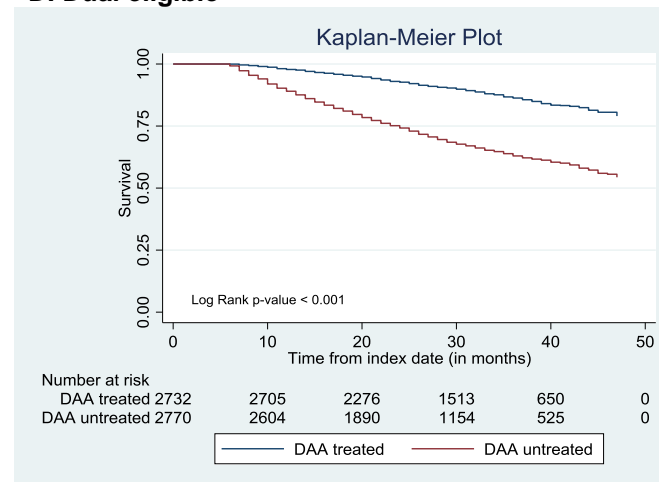

Abbreviations: DAA, Direct-acting antiviral agent

<sup>a</sup> Non dual eligibles are eligible for Medicare only

<sup>b</sup> Dual eligibles are eligible for Medicare and Medicaid

**eFigure 2. Non-cirrhosis patients – Survival stratified by receipt of Direct-Acting Antiviral (DAA) therapy (by patient sub-group)**

**A. Female**

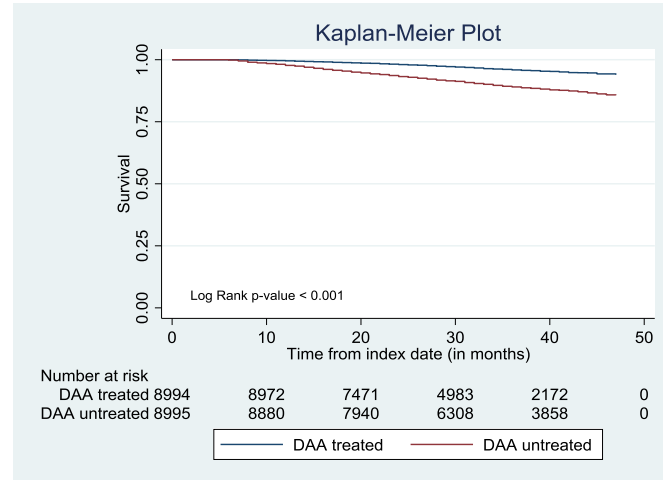

**B. Male**

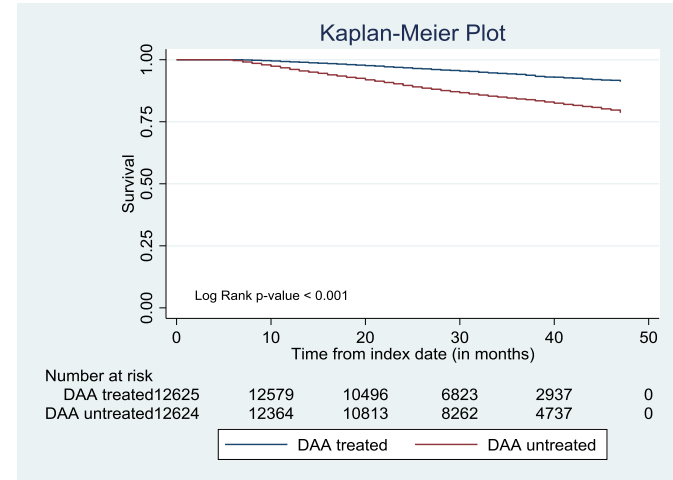

**C. Non-dual-eligible<sup>a</sup>**

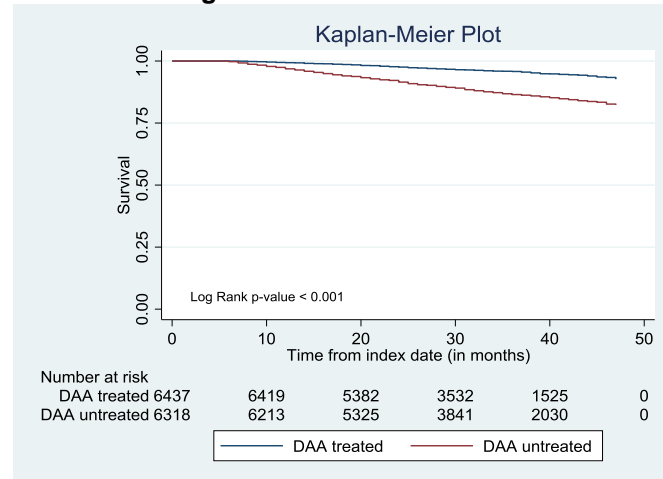

**D. Dual eligible<sup>b</sup>**

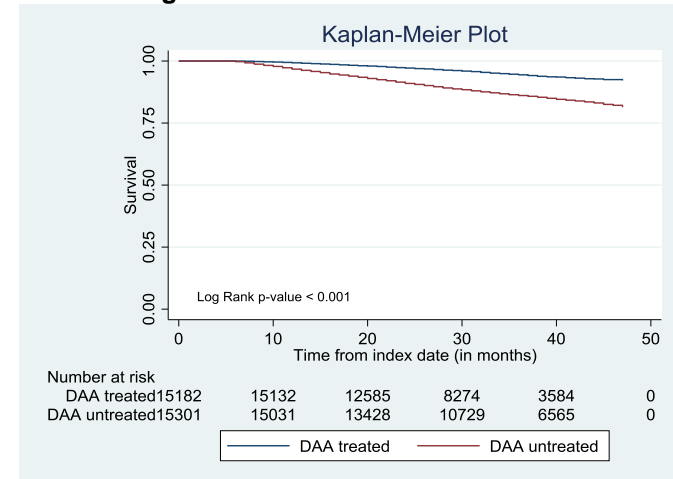

Abbreviations: DAA, Direct-acting antiviral agent

<sup>a</sup> Non dual eligibles are eligible for Medicare only

<sup>b</sup> Dual eligibles are eligible for Medicare and Medicaid

**eFigure 3. Adjusted hazard ratios<sup>a</sup> for mortality comparing direct-acting antiviral (DAA) treated and DAA untreated (patients alive for one year)**

**A Among cirrhosis patients**

|                                 | N     | HR (95% CIs)     | P value |
|---------------------------------|-------|------------------|---------|
| Overall                         | 8,060 | 0.47 (0.42-0.53) | <0.001  |
| Female                          | 3,002 | 0.46 (0.38-0.57) | <0.001  |
| Male                            | 5,058 | 0.47 (0.41-0.54) | <0.001  |
| Non dual eligibles <sup>b</sup> | 2,678 | 0.50 (0.40-0.62) | <0.001  |
| Dual eligibles <sup>c</sup>     | 5,382 | 0.45 (0.39-0.52) | <0.001  |

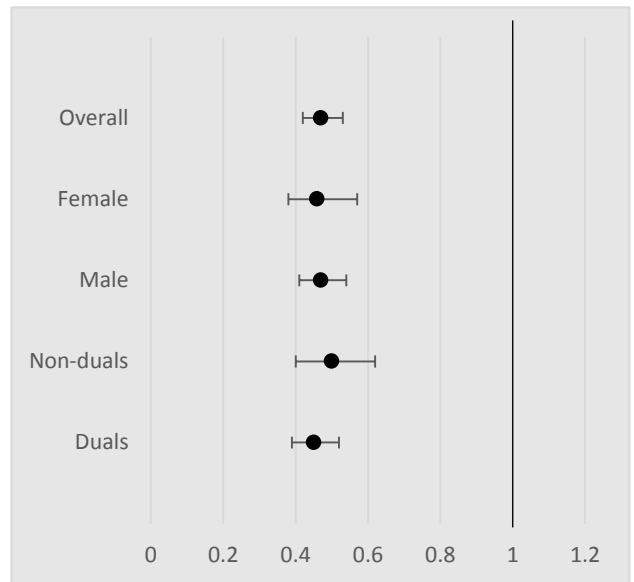

**B Among non-cirrhosis patients**

|                                 | N      | HR (95% CIs)     | P value |
|---------------------------------|--------|------------------|---------|
| Overall                         | 42,956 | 0.53 (0.48-0.57) | <0.001  |
| Female                          | 17,967 | 0.52 (0.45-0.60) | <0.001  |
| Male                            | 24,989 | 0.53 (0.47-0.58) | <0.001  |
| Non dual eligibles <sup>b</sup> | 12,668 | 0.46 (0.39-0.54) | <0.001  |
| Dual eligibles <sup>c</sup>     | 30,288 | 0.55 (0.50-0.61) | <0.001  |

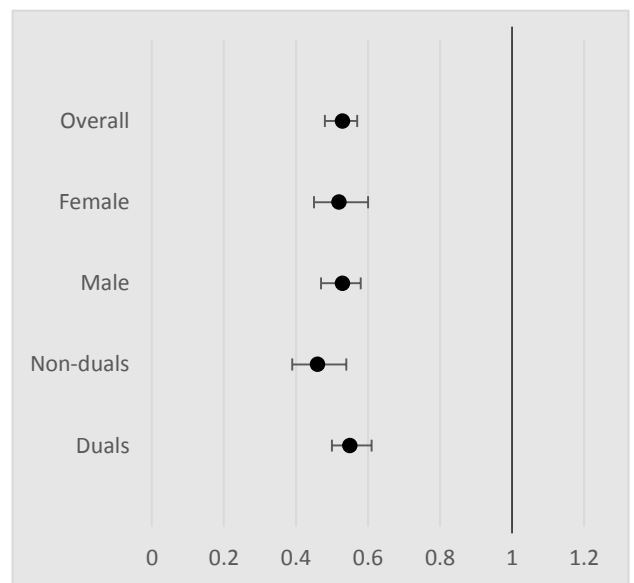

Abbreviations: CIs, Confidence intervals; HR, Hazard ratios

<sup>a</sup> Adjusted for patient characteristics and risk factors summarized in eTable1

<sup>b</sup> Non dual eligibles are eligible for Medicare only

<sup>c</sup> Dual eligibles are eligible for Medicare and Medicaid
